# Supplementary material for: Adult plant resistance in maize to northern leaf spot is a feature of partial loss-of-function alleles of Hm1
Source: PubMed Central journal article supplement (PMC6205646; doi:10.1371/journal.ppat.1007356), 2018-10-17
Supplement: ppat.1007356.s001.pdf [file ppat.1007356.s001.pdf]

**S1 Fig. Promotor comparison of different *Hm1* alleles.** Sequence comparison of the *Hm1* promotor from different *Hm1* alleles that exhibit complete resistance (in B73, Va35, and Pr1 inbreds) against *Cochliobolus carbonum* race 1 with adult plant resistance (APR) manifesting *Hm1*<sup>A</sup> (from P8 inbred) and completely susceptible *hm1* (from Pr inbred). Promotor of *Hm1* was almost similar for the first -200 bp from the transcription start site (TSS) for all *Hm1* alleles. From -200 bp onwards, the promotor sequence of *Hm1*<sup>A</sup> differed from CCR1-resistant *Hm1*<sup>B73</sup> but similar to *Hm1* alleles from CCR1-resistant inbred Va35 and Pr1, and CCR1-susceptible Pr.

```

Hm1-B73      -----TTAATGAAGTTATCGATGTTTGTATATTTACGACTATAACCTTCACCTCTGA
Hm1A        -TTGGACTTAATGACGTGCCAGTCGAATGGCT-----TCCATCCTTCT-----G-
Hm1-Va35    ATTGGACTTAATGACGTGCCAGTCGAATGGCT-----TCCATCCTTCT-----G-
Hm1-Pr1     ATTGGACTTAATGACGTGCCAGTCGAATGGCT-----TCCATCCTTCT-----G-
hm1-Pr      ATTGGACTTAATGACGTGCCAGTCGAATGGCT-----TCCATCCTTCT-----G-
                *****.** . .*: *::** .*          * . *:*****:      *

```

```

Hm1-B73      CCGCTAATGCTTGTTTAGACCATATTTG-----
Hm1A        ----TACTGCTAGTTTCACCAATTCTCGGGTGATGTGCGTTCCTTGTTATGGATTTCTT
Hm1-Va35    ----TACTGCTAGTTTCACCAATTCTCGGGTGATGTGCGTTCCTTGTTATGGATTTCTT
Hm1-Pr1     ----TACTGCTAGTTTCACCAATTCTCGGGTGATGTGCGTTCCTTGTTATGGATTTCTT
hm1-Pr      ----TACTGCTAGTTTCACCAATTCTCGGGTGATGTGCGTTCCTTGTTATGGATTTCTT
                **.*****:*****..*.**: * *

```

```

Hm1-B73      -----GATGTTGTTGTAT-----TAA--AATATTAT-----
Hm1A        CATGCATGA-----ATGGGTGTTGTGAGCTTTTGGGTAGTCAATCTTTTTATGTGACAA
Hm1-Va35    CATGCATGATGGTCCATGGGTGTTGTGAGCTTTTGGGTAGTCAATCTTTTTATGTGACAA
Hm1-Pr1     CATGCATGATGGTCCATGGGTGTTGTGAGCTTTTGGGTAGTCAATCTTTTTATGTGACAA
hm1-Pr      CATGCATGATGGTCCATGGGTGTTGTGAGCTTTTGGGTAGTCAATCTTTTTATGTGACAA
                *.****** . .*          *.* .*:*****

```

```

Hm1-B73      --GTTATTAAGGAACCATTGTTTTAGCATTGTATTCAAAATTATGAAGTT--TTTATATG
Hm1A        TCGTTCGTTGGGTGCCAAGGGTGTTTAAAT-TTCTCCA--TGTATGAAGAAATTTGACTTG
Hm1-Va35    TCGTTCGTTGGGTGCCAAGGGTGTTTAAAT-TTCTCCA--TGTATGAAGAAATTTGACTTG
Hm1-Pr1     TCGTTCGTTGGGTGCCAAGGGTGTTTAAAT-TTCTCCA--TGTATGAAGAAATTTGACTTG
hm1-Pr      TCGTTCGTTGGGTGCCAAGGGTGTTTAAAT-TTCTCCA--TGTATGAAGAAATTTGACTTG
                ***. *:.**:.**: * * *: .* *.* * : *****: * * * :**

```

Hm1-B73 CAAATGAT----TCACTCGAAAAACAAAAGTATCAA---AATCATAGTATTTTCTCTCT  
Hm1A CTTGAGATTTAAACTCACCTAATTACATTTAATTCATATCAATCCAAGTGGATTG-----  
Hm1-Va35 CTTGAGATTTAAACTCACCTAATTACATTTAATTCATATCAATCCAAGTGGATTG-----  
Hm1-Pr1 CTTGAGATTTAAACTCACCTAATTACATTTAATTCATATCAATCCAAGTGGATTG-----  
hm1-Pr CTTGAGATTTAAACTTACCTAATTACATTTAATTCATATCAATCCAAGTGGATTG-----  
\*:::\*\*\* :\*: :\* :\*:\*\*\*:::\*\*\*: \*\*\*\*\*:\*\*\*. :\*\*

Hm1-B73 CTAAAATTCCAAAAATATTTTACATCTAAAGTTGATGTCTTGGCCTCCCGCGCTGTTTTA -241 from TSS  
Hm1A AGAGCTAACCA-----ACAAAACCCTAAAGTTGATGTCTTGACCTCCCGTGCAGTTTTA  
Hm1-Va35 AGAGCTAACCA-----ACAAAACCCTAAAGTTGATGTCTTGACCTCCCGTGCAGTTTTA  
Hm1-Pr1 AGAGCTAACCA-----ACAAAACCCTAAAGTTGATGTCTTGACCTCCCGTGCAGTTTTA  
hm1-Pr AGAGCTAACCA-----ACAAAACCCTAAAGTTGATGTCTTGACCTCCCGTGCAGTTTTA  
. \*..:::\*\*\* : :\*:.. \*\*\*\*\*.\*\*\*\*\* \*\*:\*\*\*\*\*

Hm1-B73 CCTTCCTCCTCTGGACACCAACCACAGGCCGACAACCGAGTAAGCCGGTCAAT-TTTGGT -181 from TSS  
Hm1A CCTTCCTCCTCTGGACACCAACCACAGGCCGACAACCGAGTAAGCCGGTCAATTTTGGT  
Hm1-Va35 CCTTCCTCCTCTGGACACCAACCACAGGCCGACAACCGAGTAAGCCGGTCAATTTTGGT  
Hm1-Pr1 CCTTCCTCCTCTGGACACCAACCACAGGCCGACAACCGAGTAAGCCGGTCAATTTTGGT  
hm1-Pr CCTTCCTCCTCTGGACACCAACCACAGGCCGACAACCGAGTAAGCCGGTCAATTTTGGT  
\*\*\*\*\*:\*\*\*\*\*

Hm1-B73 ATCCTGCTCATGACTC-----ATATCAGGCGGTAGCCGAGCA  
Hm1A ATCCTGCTCATGACTCATGATTATATTTAAACTACACACATATCAGGCGGCAGCCGAG--  
Hm1-Va35 ATCCTGCTCATGACTCATGATTATATTTAAACTACACACATATCAGGCGGCAGCCGAG--  
Hm1-Pr1 ATCCTGCTCATGACTCATGATTATATTTAAACTACACACATATCAGGCGGCAGCCGAG--  
hm1-Pr ATCCTGCTCATGACTCATGATTATATTTAAACTACACACATATCAGGCGGCAGCCGAG--  
\*\*\*\*\* \*\*\*\*\* \*\*\*\*\*

Hm1-B73 GCCGCCAGCTTTCTCATGCCAGAGCAAACCCATAGGTCCAGTCCAAATCCAATCCCTGT  
Hm1A -CCGCCATCTTTCTCATGCCAGAGCAAACCCATAGGTCCAGTCCAAATCCAATCCCTGT  
Hm1-Va35 -CCGCCATCTTTCTCATGCCAGAGCAAACCCATAGGTCCAGTCCAAATCCAATCCCTGT  
Hm1-Pr1 -CCGCCATCTTTCTCATGCCAGAGCAAACCCATAGGTCCAGTCCAAATCCAATCCCTGT  
hm1-Pr -CCGCCATCTTTCTCATGCCAGAGCAAACCCATAGGTCCAGTCCAAATCCAATCCCTGT  
\*\*\*\*\* \*\*\*\*\*

|          |                                       |
|----------|---------------------------------------|
| Hm1-B73  | TGCCATCAGAATTTTCAGGGGCAGCC <b>ATG</b> |
| Hm1A     | TGCCATCAGAATTTTCAGGGGCAGCC <b>ATG</b> |
| Hm1-Va35 | TGCCATCAGAATTTTCAGGGGCAGCC <b>ATG</b> |
| Hm1-Pr1  | TGCCATCAGAATTTTCAGGGGCAGCC <b>ATG</b> |
| hm1-Pr   | TGCCATCAGAATTTTCAGGGGCAGCC <b>ATG</b> |
|          | *****                                 |
