# Supplementary material for: Adult plant resistance in maize to northern leaf spot is a feature of partial loss-of-function alleles of Hm1
Source: PubMed Central journal article supplement (PMC6205646; doi:10.1371/journal.ppat.1007356), 2018-10-17
Supplement: ppat.1007356.s002.pdf [file ppat.1007356.s002.pdf]

**S2 Fig. HM1 peptide sequence comparison of *hm1* alleles.** Sequence comparison of HM1<sup>A</sup> with HM1 from the resistant maize inbreds (B73, Va35, W22, and Pr1), maize cultivars (Enano and Pira), HM1 homologs [sorghum (*Sorghum bicolor*), rice (*Oryza sativa*), and barley (*Hordeum vulgare*)], and maize dihydroflavonol 4-reductase (DFR). Among the five amino acid substitutions present in HM1<sup>A</sup> (highlighted in red and bold), the L116 residue was a conserved in all *Hm1* alleles and orthologs.

|             |                                                                               |
|-------------|-------------------------------------------------------------------------------|
| HM1-B73     | -----MAEKESNGVRVCVTGGAGFIGSWLVRKLLLEKGYTVHATLRNTGDEAKAGLLRR                   |
| HM1A        | -----MAEKESNGVRVCVTGGAGFIGSWLVRKLLLEKGYTVHATLRNTGDEAKAGLLRR                   |
| HM1-Va35    | -----MAEKESNGVRVCVTGGAGFIGSWLVRKLLLEKGYTVHATLRNTGDEAKAGLLRR                   |
| HM1-Pr1     | -----MAEKESNGVRVCVTGGAGFIGSWLVRKLLLEKGYTVHATLRNTGDEAKAGLLRR                   |
| HM1-W22     | -----MAEKESNGVRVCVTGGAGFIGSWLVRKLLLEKGYTVHATLRNTGDEAKAGLLRR                   |
| HM1-Enano   | -----DEAKAGLLRR                                                               |
| HM1-Pira    | -----DEAKAGLLRR                                                               |
| HM1-Sorghum | -----MAENESSGVRVCVTGGAGFIGSWLVKKLLEKGYTVHATLRNTGDEEKAGLLRR                    |
| HM1-Rice    | MAEEGR-SGGVAGDGVRVCVTGGAGFIASWLVKKLLERGCIVHATLRSMGDEEKAGLLRR                  |
| HM1-Barley  | MAEEGKGTGSNGGRGVRACVTGGAGFIGSWLVRKLLLEAGYTVHATLRSIGDEGKAGLLRG                 |
| DFR-Maize   | -----MAGGGATVCVTGAGGFIASWVVKLLLSRGTGTVHGTVRHLSDEKT-GHLKR                      |
|             | <b>S99Y</b> <b>D110Y</b>                                                      |
| HM1-B73     | LVPGAA--ERLRLFQADLFDAATFAPAIAGCQFVFLVATPFGLDSAG <b>S</b> QYKSTAEAVV <b>DA</b> |
| HM1A        | LVPGAA--ERLRLFQADLFDAATFAPAIAGCQFVFLVATPFGLDSAG <b>Y</b> QYKSTAEAVV <b>YA</b> |
| HM1-Va35    | LVPGAA--ERLRLFQADLFDAATFAPAIAGCQFVFLVATPFGLDSAG <b>Y</b> QYKSTAEAVV <b>DA</b> |
| HM1-Pr1     | LVPGAA--ERLRLFQADLFDAATFAPAIAGCQFVFLVATPFGLDSAG <b>Y</b> QYKSTAEAVV <b>DA</b> |
| HM1-W22     | LVPGAA--ERLRLFQADLFDAATFAPAIAGCQFVFLVATPFGLDSAG <b>S</b> QYKSTAEAVV <b>DA</b> |
| HM1-Enano   | LVPGAA--ERLRLFQADLFYAATFAPAIAGCQFVFLVATPFGLDSAG <b>S</b> QYKSTAEAVV <b>YA</b> |
| HM1-Pira    | LVPGAA--ERLRLFQADLFDAATFAPAIAGCQFVFLVATPFGLDSAG <b>Y</b> QYKSTAEAVM <b>YA</b> |
| HM1-Sorghum | LVPGAA--ERLRLFQADLFDAATFAPAIAGCQFVFLVATPFGLQDAG <b>S</b> KYKSTAEAVV <b>DA</b> |
| HM1-Rice    | LVPGAA--ERLRLFQADLFDAATFAPAIAGCQFVFLIATPYGLEASN <b>S</b> KYKNTADA <b>AVDA</b> |
| HM1-Barley  | LVPGGAPPERLVLFQADLFDAATFAPAIAGCHFVFLVANPSAHE-PA <b>S</b> KYKTSAEAA <b>DA</b>  |
| DFR-Maize   | LENA---AGNLRIFKADLLDYDAMAAVVGCGVFHVATPVPSEDLT <b>D</b> PELQMLGPAV <b>TG</b>   |

**L116H**

|             |                                                               |
|-------------|---------------------------------------------------------------|
| HM1-B73     | VRAILRQCEESRTVKRVIHTASVAAAASPLLEEE-VSASGVGYRDFIDESCWTSLNVDYPL |
| HM1A        | VRAIHRQCEESRTVKRVIHTASVAAAASPLLEEE-VSASGVGYRDFIDESCWTSLNVDYPL |
| HM1-Va35    | VRAILRQCEESRTVKRVIHTASVAAAASPLLEEE-VSASGVGYRDFIDESCWTSLKVNYP  |
| HM1-Pr1     | VRAILRQCEESRTVKRVIHTASVAAAASPLLEEE-VSASGVGYRDFIDESCWTSLNVDYPL |
| HM1-W22     | VHAILRQCEESRTVKRVIHTASVAAAASPLLEEE-VPASGVGYRDFIDESCWTSLNVDYPL |
| HM1-Enano   | VRAILRQCEESRTVKRVIHTASVAAAASPLLEEE-VSASGVGYRDFIDESCWTSLNVDYPL |
| HM1-Pira    | VRAILRQCEESRTVKRVIHTASVAAAASPLLEEE-VSASGVGYRDFIDESCWTSLNVDYPL |
| HM1-Sorghum | VRAILRQCEESRTVKRVIHTASVSAASPLKEEE-VS-GVIGYREFISESCWTSPDVDYPL  |
| HM1-Rice    | VREILRQCAESKTVKRVIHTASISTASPLIDVPGAGVGAAGYRDFIDESCWTPLDVDYPL  |
| HM1-Barley  | VRVILRLCAESRTVKRVIHTASVTAASPLTKSSS--AAAVYGDFISESCWTLLDVNYPL   |
| DFR-Maize   | TTNVLLKA-ASSANVQRVVVVSSMVAVE-----ISPDKWPEGKVRDERCWSDREFCRSI   |

**S191N**

|             |                                                              |
|-------------|--------------------------------------------------------------|
| HM1-B73     | RSAHFDKYILSKLRSEQELLSYNGGESPAFEVVTLPLGLVAGDTVLRAPETVESAVAPV  |
| HM1A        | RSAHFDKYILSKLRSEQELLYNNGGESPAFEVVTLPLGLVAGDTVLRAPETVESAVAPV  |
| HM1-Va35    | RSAHFDKYILSKLRSEQELLSYNGGESPAFEVVTLPLGLVAGDTVLRAPETVESAVAPV  |
| HM1-Pr1     | RSAHFDKYILSKLRSEQELLSYNGGESPAFEVVTLPLGLVAGDTVLRAPETVESAVAPV  |
| HM1-W22     | RSAHFDKYILSKLQSEQELLSYNGGESPAFEVVTLPLGLVAGDTVLRAPETVESAVAPV  |
| HM1-Enano   | RSAHFDKYILSKLRSEQELLYNNGGESPAFEVVTLPLGLVAGDTVLRAPETVESAVAPV  |
| HM1-Pira    | RSAHFDKYILSKLRSEQELLYNNGSESPAFEVVTLPLGLVAGDTVLRAPETVESAVAPV  |
| HM1-Sorghum | RSAHFDKYILSKVQSEQELLSYNGGESPAFEVVTLALGLVAGDTVLRVPETVESAVSPV  |
| HM1-Rice    | RSAHFDKYVLSKMMSEKELLYGNDGEGRAFEVVTLPCGLVAGDTVLRAPETLENVAVSPV |
| HM1-Barley  | RSVHFDKYIESKVLSEKELLSYNDGENPAFEVVTLPLGLVGGNTVLGYLPETMESVAVPV |
| DFR-Maize   | E----SWYPVAKIISEEAALAYG--QQTGLDVVTINPGLVFGPMLQPTVNTTIQFLI--- |

**L240P**

|             |                                                              |
|-------------|--------------------------------------------------------------|
| HM1-B73     | SRSEPCFGLLRILQQLLGSPLVHVDDVCDALVFCMERRPSVAGRFLCAAAYPTIHDVVA  |
| HM1A        | SRSEPCFGLPRILQQLLGSPLVHVDDVCDALVFCMERRPSVAGRFLCAAAYPTIHDVVA  |
| HM1-Va35    | SRSEPYFGLPRILQQLLGSPLVHVDDVCDALVFCMERRRSVAGRFLCAAAYPTIHDVVA  |
| HM1-Pr1     | SRSEPCFGLPRILQQLLGSPLVHVDDVCDALVFCMERRPSVAGRFLCAAAYPTIHDVVA  |
| HM1-W22     | SRSEPYFGLLRILQQLLGSPLVHVDDVCDALVFCMERRPSVAGRFLCAAAYPTIHDVVA  |
| HM1-Enano   | SRSEPYFGLLRILQQLLGSPLVHVDDVCDALVFCMERRPSVAGRFLCAA-----       |
| HM1-Pira    | SRSEPCFGLPRILQQLLGSPLVHVDDVCDALVFCMERRPSVAGRFLCAA-----       |
| HM1-Sorghum | SRNEAYFGLPRILQQLLGSPLVHVDDVCDALIFCMERRHSIAGRFLCAAAYPTIHDVVG  |
| HM1-Rice    | SRNEPSFAFLRLLQRLVGSVPLVHADDVCDALVFCMDQ-PSLAGRFLCSAAYPTIHDIVE |
| HM1-Barley  | TKQEPFMLPRILQRLVGSVPLVHVDDVCAALIFCMEQ-PALSGRFLCAAAYPTIHDILD  |
| DFR-Maize   | -----YFLKGGPDPVKNKLWHIVDVRDVADAMLLLYEV-PEATGRHICAPHVISARDLLD |

|             |                                                               |
|-------------|---------------------------------------------------------------|
| HM1-B73     | HYASKFPHLDILKET-EAVATV---RPARDRLGELGFKYKYGMEEILDSSVACAARLGSL  |
| HM1A        | HYASKFPHLDILKET-EAVATV---RPARDRLGELGFKYKYGMEEILDSSVACAARLGSL  |
| HM1-Va35    | HYASKFPHLDILKET-EAVATV---RPARDRLGELGFKYKYGMEEILDSSVACAARLGSL  |
| HM1-Pr1     | HYASKFPHLDILKET-EAVATV---RPARDRLGELGFKYKYGMEEILDSSVACAARLGSL  |
| HM1-W22     | HYASKFPHLDILKETTEAVATV---RPARDRLGELGFKYKYGMEEILDSSVACAARLGSL  |
| HM1-Enano   | -----                                                         |
| HM1-Pira    | -----                                                         |
| HM1-Sorghum | HYARKFPHLDILKET-EAVARV---QPDGDR LGELGFVYKYGIEEILDSSVACAARLGCL |
| HM1-Rice    | HFAAKYPHLDVLKEPEREVARV---QPAADKLGELGFRYKYGMEEILDGSVGCAARLGYI  |
| HM1-Barley  | HYGSKYPHLDLLRET-DEVARV---QPDKNKLGELGFYKYGLKEILDESIDCAVRLGSL   |
| DFR-Maize   | LLKSMYPDYPCIANE-SILDRDHPAPMTSDKLLKIGWSCRPL-LEETIVDTVECCLRAGFL |

|             |                    |
|-------------|--------------------|
| HM1-B73     | DASKLGLQKG-----    |
| HM1A        | DASKLGLQKG-----    |
| HM1-Va35    | DASKLGLQKG-----    |
| HM1-Pr1     | DASKLGLQKA-----    |
| HM1-W22     | DGSKLGLQKG-----    |
| HM1-Enano   | -----              |
| HM1-Pira    | -----              |
| HM1-Sorghum | DATKLSMQKG-----    |
| HM1-Rice    | DAAKLRPQEG-----    |
| HM1-Barley  | DASKLIVQQG-----    |
| DFR-Maize   | DDVGGETSCRFPPLLNQI |
