# Supplementary material for: Adult plant resistance in maize to northern leaf spot is a feature of partial loss-of-function alleles of Hm1
Source: PubMed Central journal article supplement (PMC6205646; doi:10.1371/journal.ppat.1007356), 2018-10-17
Supplement: ppat.1007356.s003.pdf [file ppat.1007356.s003.pdf]

**S3 Fig. Null allele *hm1-2* identified in B73-EMS M<sub>2</sub> population.** (A) Ethyl methanesulfonate (EMS) mutagenesis caused a G to A substitution at the junction of exon3/intron3. (B) Predicted protein sequence of *hm1-2* is 176 amino acids similar to HM1<sup>B73</sup> and the mutation in the intron is predicted to generate 26 different amino acids before resulting in a truncated protein.

**A**

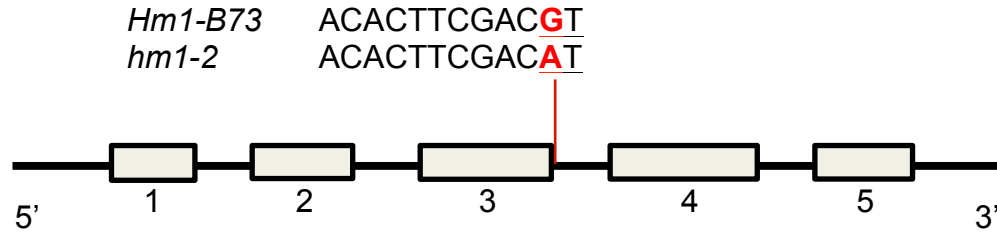

**B**

|         |                                                                          |     |
|---------|--------------------------------------------------------------------------|-----|
| Hm1-B73 | MAEKESNGVRVCVTGGAGFIGSWLVRKLLLEKGYTVHATLRNTGDEAKAGLLRRLVPGAAE            | 60  |
| hm1-2   | MAEKESNGVRVCVTGGAGFIGSWLVRKLLLEKGYTVHATLRNTGDEAKAGLLRRLVPGAAE            | 60  |
|         | *****                                                                    |     |
| Hm1-B73 | RLRLFQADLFDAATFAPAIAGCQFVFLVATPFGGLDSAGSQYKSTAEAVVDAVRAILRQCE            | 120 |
| hm1-2   | RLRLFQADLFDAATFAPAIAGCQFVFLVATPFGGLDSAGSQYKSTAEAVVDAVRAILRQCE            | 120 |
|         | *****                                                                    |     |
| Hm1-B73 | ESRTVKRVIHTASVAAASPLLEEEVSASGVGYRDFIDESCWTSLNVDYPLRSAHFDKYIL             | 180 |
| hm1-2   | ESRTVKRVIHTASVAAASPLLEEEVSASGVGYRDFIDESCWTSLNVDYPLRSAHF <del>DISSI</del> | 180 |
|         | ***** :                                                                  |     |
| Hm1-B73 | SK-----LRSEQELLSYNGGESPAFEVVTLPLGLVAGDTVLRAPETVESAVAPVSRS                | 233 |
| hm1-2   | QAKLLLISELERLITLIFFS-----                                                | 200 |
|         | .            * .            * :    : .                                   |     |
| Hm1-B73 | EPCFGLLRILQQLLGSPLVHVDDVCDALVFCMERRPSVAGRFLCAAAYPTIHDVVAHYA              | 293 |
| hm1-2   | -----                                                                    | 200 |
| Hm1-B73 | SKFPHLDILKETEA VATVRPARDRLGELGFKYKYGMEEILDSSVACAARLGS LDASKLGL           | 353 |
| hm1-2   | -----                                                                    | 200 |
| Hm1-B73 | QKG                                                                      | 356 |
| hm1-2   | ---                                                                      | 200 |
