# Supplementary material for: Adult plant resistance in maize to northern leaf spot is a feature of partial loss-of-function alleles of Hm1
Source: PubMed Central journal article supplement (PMC6205646; doi:10.1371/journal.ppat.1007356), 2018-10-17
Supplement: ppat.1007356.s004.pdf [file ppat.1007356.s004.pdf]

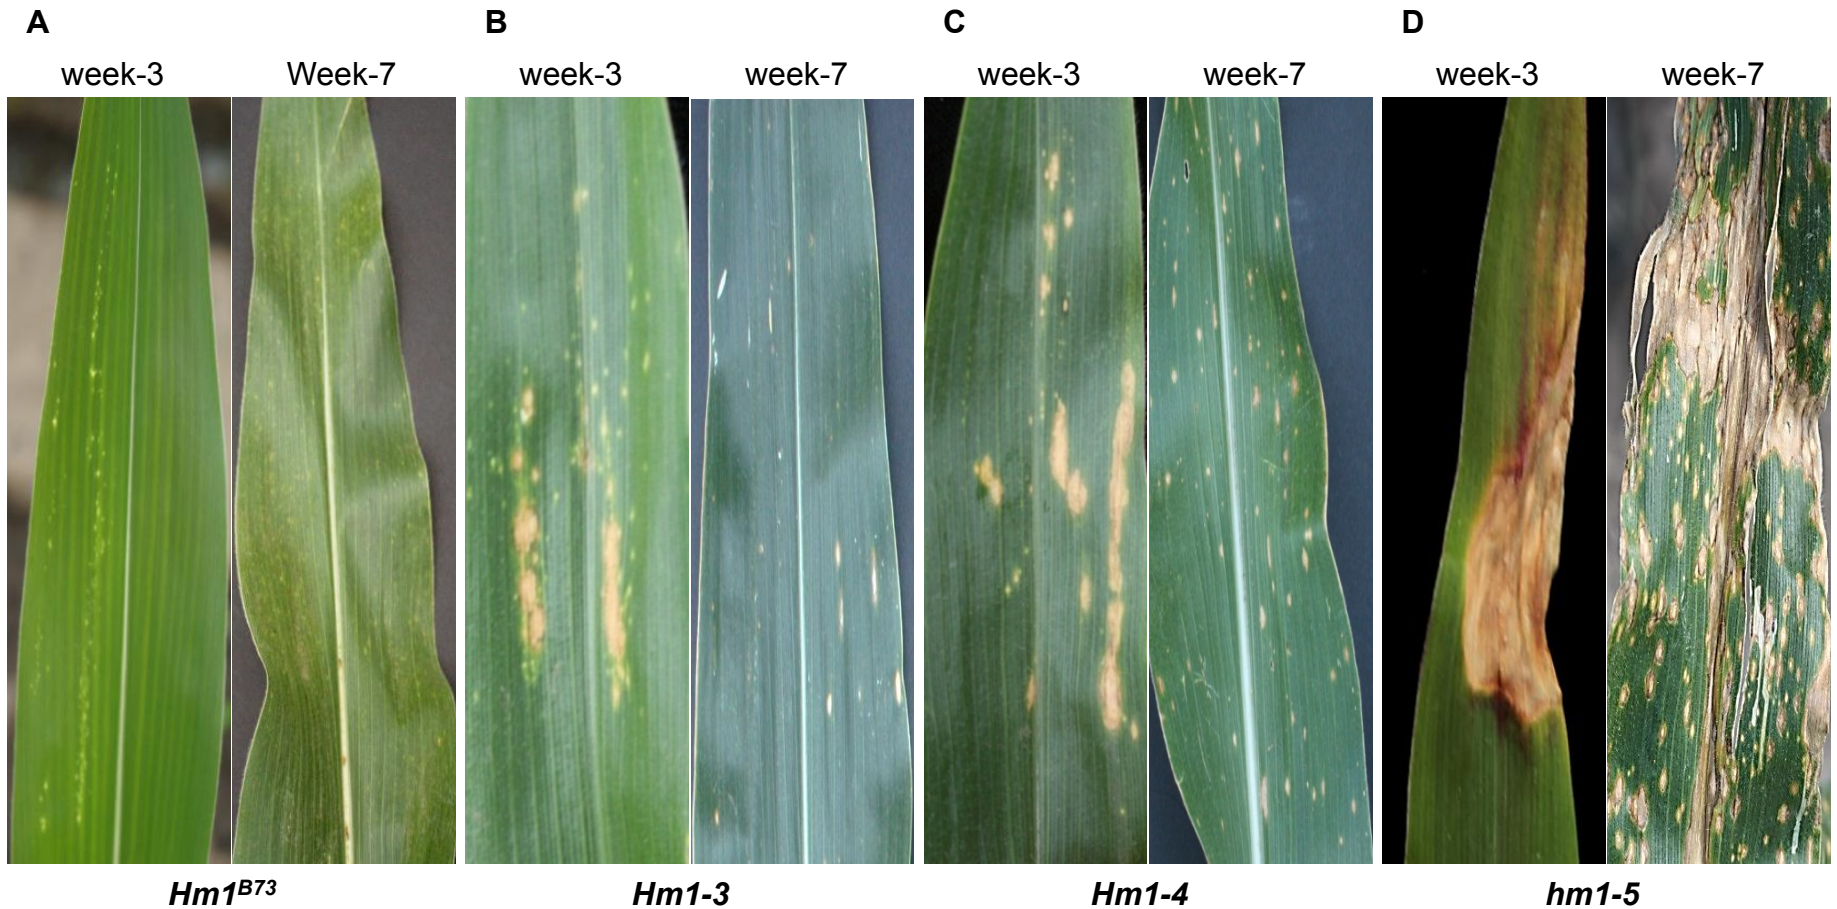

**S4 Fig. Disease response of two novel APR alleles generated using EMS mutagenesis.**

(A) *Hm1<sup>B73</sup>* plants were resistant at all stages of plant development. Two novel APR alleles, *Hm1-3* (B) and *Hm1-4* (C), generated by targeted EMS mutagenesis were susceptible as seedlings (week-3) and became resistant to CCR1 at week-7. A novel null allele, *hm1-5* (D) remained susceptible throughout the age of the plant.
