# Supplementary material for: Adult plant resistance in maize to northern leaf spot is a feature of partial loss-of-function alleles of Hm1
Source: PubMed Central journal article supplement (PMC6205646; doi:10.1371/journal.ppat.1007356), 2018-10-17
Supplement: ppat.1007356.s005.pdf [file ppat.1007356.s005.pdf]

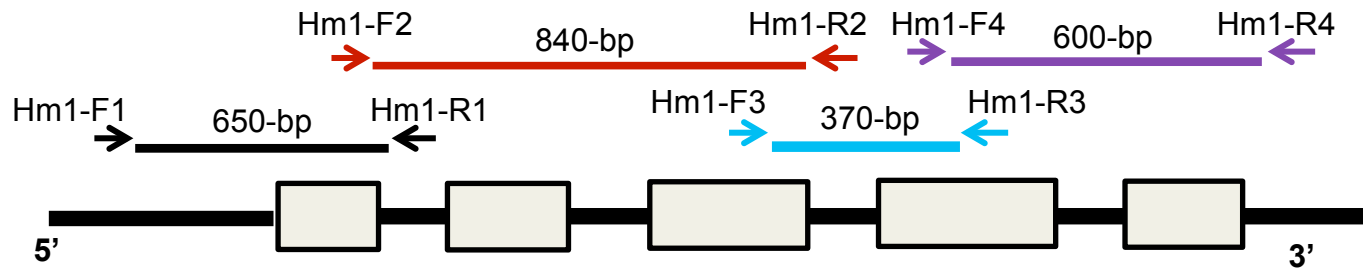

**S5 Fig. Overlapping primers to amplify *Hm1*<sup>B73</sup> from novel *Hm1* mutants.**

Four primer pairs that preferentially amplified overlapping sequences of the *Hm1*<sup>B73</sup> allele over the *hm1*<sup>Pr</sup> allele from heterozygous M<sub>1</sub> plants generated using the targeted EMS mutagenesis screen. Grey boxes represent the exons while the black lines between the exons represent the introns. Different primer pairs used to amplify *Hm1*<sup>B73</sup> are marked using different colors with the amplicon size listed above each fragment.
