# Supplementary material for: Adult plant resistance in maize to northern leaf spot is a feature of partial loss-of-function alleles of Hm1
Source: PubMed Central journal article supplement (PMC6205646; doi:10.1371/journal.ppat.1007356), 2018-10-17
Supplement: ppat.1007356.s006.pdf [file ppat.1007356.s006.pdf]

**S1 Table. Molecular marker (primer) combinations used to differentiate APR alleles from wild-type *Hm1*. Using PCR-based markers, APR alleles were introgressed into B73 genetic background.**

| Project                                                               | Forward primer                 | Reverse primer                |
|-----------------------------------------------------------------------|--------------------------------|-------------------------------|
| <b>Primers for linkage analysis</b>                                   |                                |                               |
| <i>Genetic cross: (P8 × Pr) × Pr</i>                                  | 5'-GCCACCAAGGTCCAGC-3'         | 5'-GATGTCGAGGTGAGGGAAC-3'     |
| Differentiate <i>Hm1A</i> from <i>hm1</i> (256-bp insertion in exon4) | 5'- CCGGCGTTCGAGGTGGTGA-3'     | 5'-GATGTCGAGGTGAGGGAAC-3'     |
| Differentiate <i>Hm1A</i> and <i>Hm1<sup>Pr1</sup></i> allele         | 5'-TACGCGGTGCGCGGATCCA-3'      | 5'-CAGGCGTTCAGTTCAGAA-3'      |
|                                                                       | 5'- GACGCGGTGCGCGGATCCT-3'     | 5'- CAGGCGTTCAGTTCAGAA-3'     |
| <i>Hm1A</i> introgressed into B73                                     | 5'-GAGGTGAGGTACCCTGGTCC-3'     | 5'- CAGACGCACCGGTGTTCCGC - 3' |
| Differentiate <i>Hm1A</i> from <i>Hm1</i>                             | 5'-TACGCGGTGCGCGGATCCA-3'      | 5'-CAGGCGTTCAGTTCAGAA-3'      |
| Differentiate novel B73 null allele ( <i>hm1-2</i> ) from <i>Hm1</i>  | 5'-TCCGAAGCGCACACTTCGACG-3'    | 5'-GATGTCGAGGTGAGGGAAC-3'     |
| Differentiate <i>Hm1A</i> from <i>Hm1-B73</i>                         | 5'-GAGGTGAGGTACCCTGGTCC-3'     | 5'- CAGACGCACCGGTGTTCCGC - 3' |
|                                                                       | 5'-GACCGCTAATGCTTGTTTAGACC-3'  | 5'-GCGTGTTTCGCCTTTCGCGACG -3' |
| <i>Hm1-3</i> allele from <i>Hm1-B73</i> : CAPs marker - <i>NlaII</i>  | 5' GCGAAACACGCCAAAGGCGA 3'     | 5' TTCTGA ACTGGAACGCCTG 3'    |
| <i>Hm1-4</i> allele from <i>Hm1-B73</i> : CAPs marker - <i>NlaIII</i> | 5' GCTCAACGTTGACTATCCTCTCCG 3' | 5' CGCTGGGTGCACGTGGACGACG 3'  |
| <i>Hm1-5</i> allele from <i>Hm1-B73</i> : CAPs marker - <i>KpnI</i>   | 5' GCGAAACACGCCAAAGGCGA 3'     | 5' TTCTGA ACTGGAACGCCTG 3'    |
| Amplify <i>Hm1</i> over <i>hm1</i> from novel EMS mutants             | 5' GACCGCTAATGCTTGTTTAGACC 3'  | 5' GCGTCGCGAAAGGCGAAACACGC 3' |
|                                                                       | 5' GCGAAACACGCCAAAGGCGA 3'     | 5' TTCTGA ACTGGAACGCCTG 3'    |
|                                                                       | 5' GCTCAACGTTGACTATCCTCTCCG 3' | 5' CGCTGGGTGCACGTGGACGACG 3'  |
|                                                                       | 5' GCTCCTGAGCTACAACGGCGGC 3'   | 5' GGGGAAC TTGGATTGTTTCGCT 3' |
| Cloning of <i>Hm1<sup>A</sup></i> cDNA                                | 5'-ATGGCCGAAAAGGAGAGCAACG-3'   | 5'-TTATCCTTCTGTAGCCGAG-3'     |
